# Supplementary material for: Electronic and magnetic properties of Au-doped diamond surfaces by first-principles calculation
Source: Royal Society of Chemistry journal article supplement (doi:10.1039/d4cp01436g), 2024-01-01
Supplement: d4cp01436g1.pdf [file d4cp01436g1.pdf]

**Supporting information**

for

**Electronic and magnetic properties of Au-doped diamond surface by first-principles calculation**

Wei Cheng, Cong Li, Tianyi Wang, Shaoheng Cheng, Nan Gao\*, and Hongdong Li\*

State Key Lab of Superhard Materials, College of Physics, Jilin University,

Changchun 130012, China

\*Corresponding Authors

E-mail address: [gaon@jlu.edu.cn](mailto:gaon@jlu.edu.cn), [hdli@jlu.edu.cn](mailto:hdli@jlu.edu.cn).

**Table S1** Adsorption energy, areal electron density and magnetic moment of Au atom at different sites for diamond (100), (111) and (100) surfaces.

| orientation | position | adsorption energy (eV) | areal electron density (cm <sup>-2</sup> ) | magnetic moment (μ <sub>B</sub> ) |
|-------------|----------|------------------------|--------------------------------------------|-----------------------------------|
| 100         | P1       | -0.636                 | 1.97×10 <sup>13</sup>                      | 0.902                             |
|             | P2       | -0.583                 | 1.67×10 <sup>13</sup>                      | 0.949                             |
|             | P3       | -0.511                 | 1.32×10 <sup>13</sup>                      | 0.911                             |
|             | P4       | -0.496                 | 1.34×10 <sup>13</sup>                      | 0.927                             |
|             | P5       | -0.635                 | 1.88×10 <sup>13</sup>                      | 0.925                             |
| 111         | P1       | -0.673                 | 6.34×10 <sup>13</sup>                      | 0.994                             |
| 110         | P1       | -0.656                 | 3.14×10 <sup>13</sup>                      | 0.941                             |

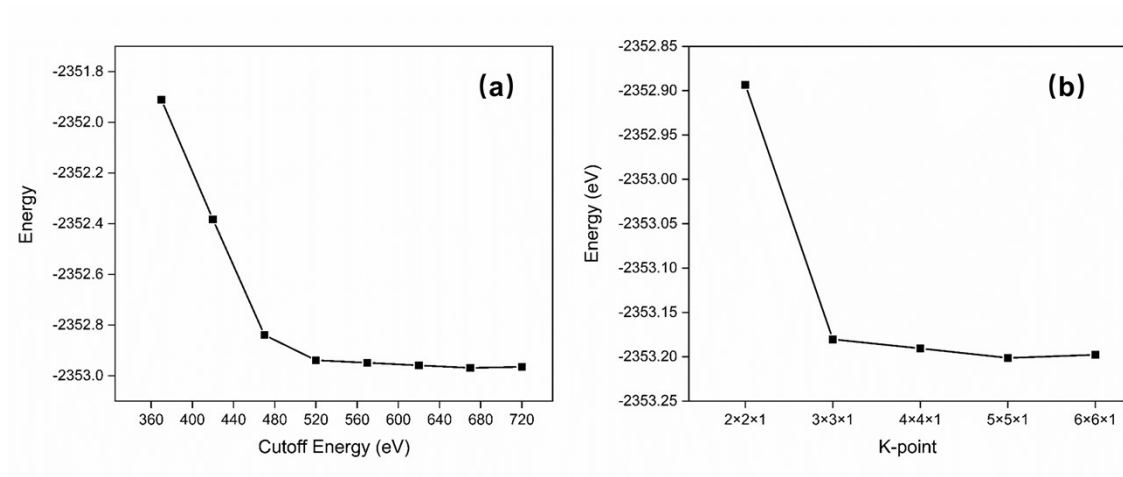

**Fig. S1.** Convergence tests of diamond (100) surface with the variation of (a) cut-off energy and (b) k-point.

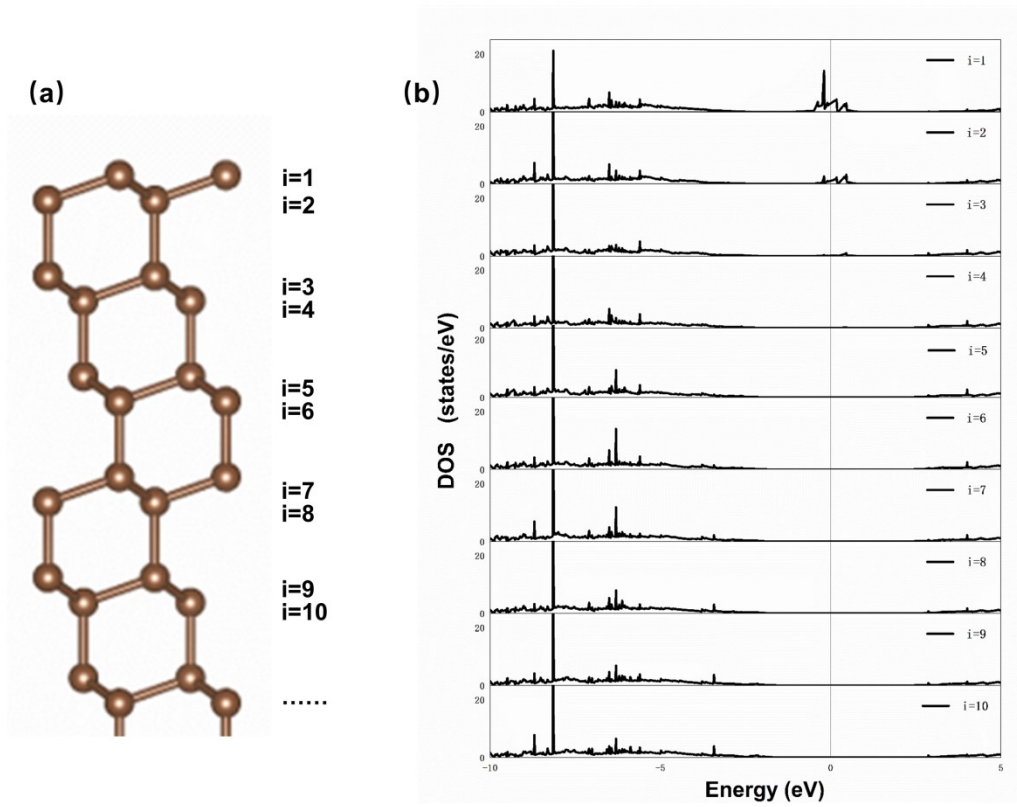

**Fig. S2.** (a) Structural model and (b) DOS of diamond (111) surface with the variation of the layers.

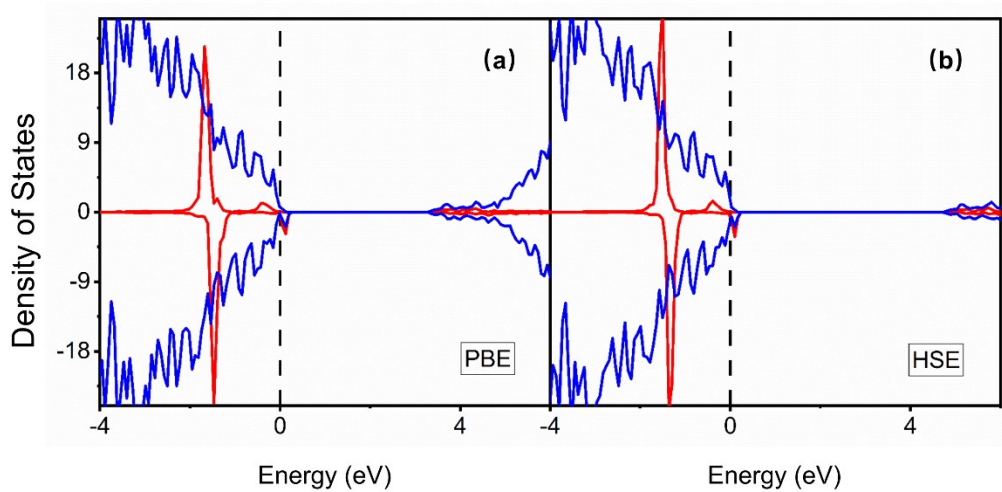

**Fig. S3.** DOS for Au-doped diamond (100) surface with the functionals of (a) PBE and (b) HSE.

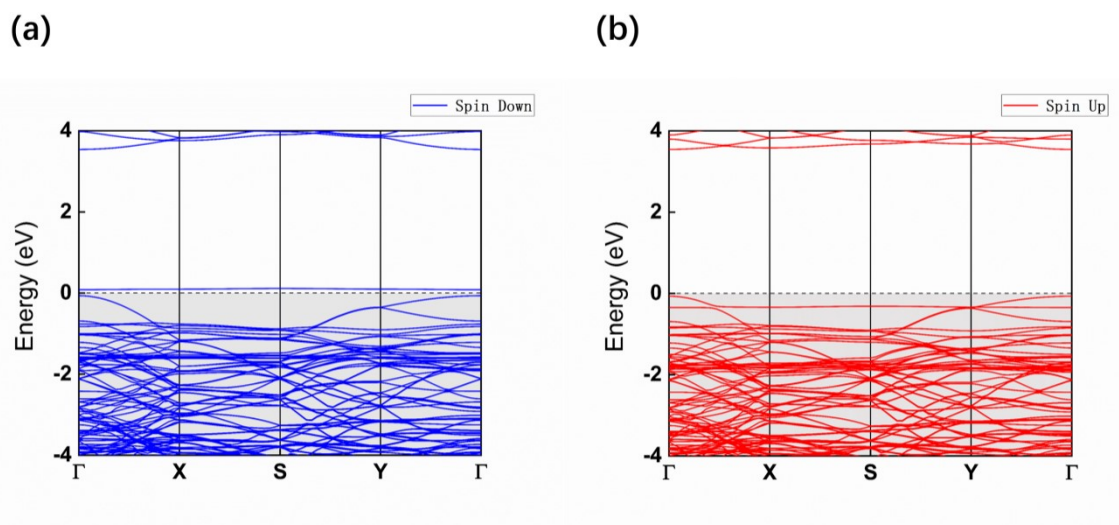

**Fig. S4.** (a) Spin-down and (b) spin-up band structures of Au-doped diamond (100) surface.

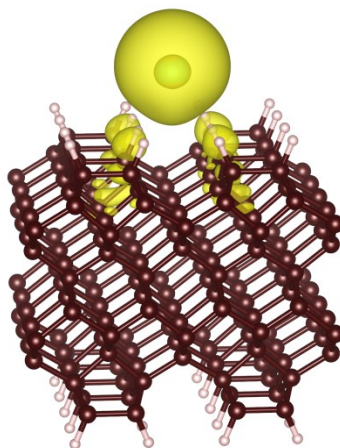

**Fig. S5.** Spin density distribution of diamond (100) surface doped with Au. The isosurface value is  $0.0007 \text{ e } \text{\AA}^{-3}$ .

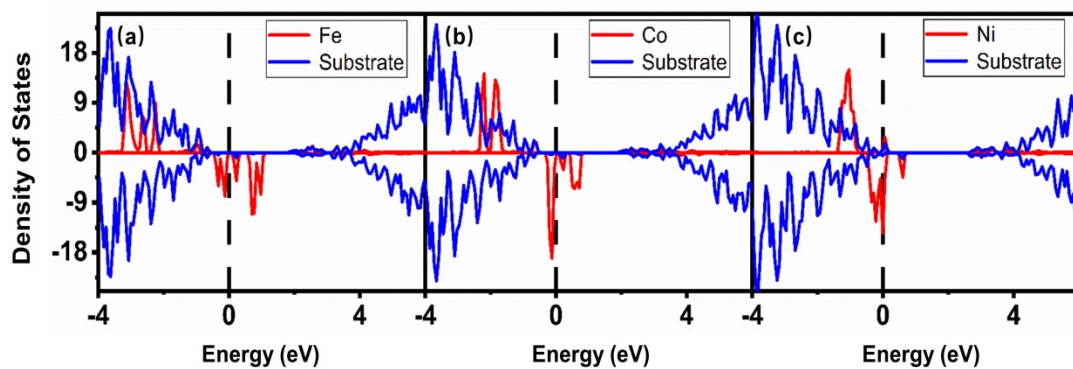

**Fig. S6.** DOS of (a) Fe, (b) Co, and (c) Ni doped diamond (111) surfaces. The Fermi level is set to zero.

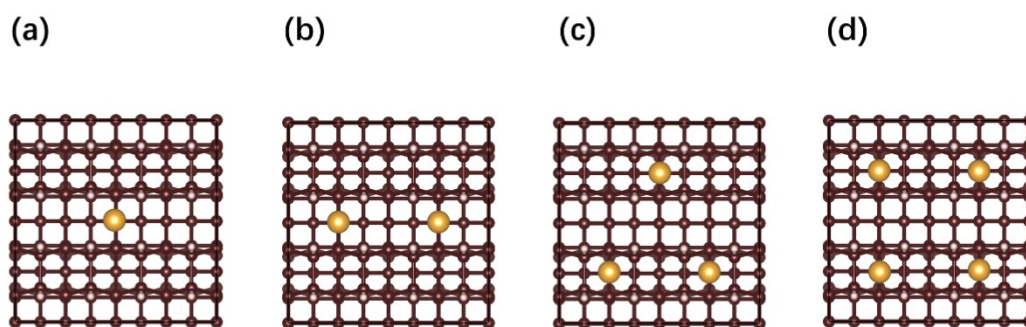

**Fig. S7.** Structures of Au-doped diamond for different doping rate at (a) 0.125 ML, (b) 0.25 ML, (c) 0.375 ML, and (d) 0.5 ML.

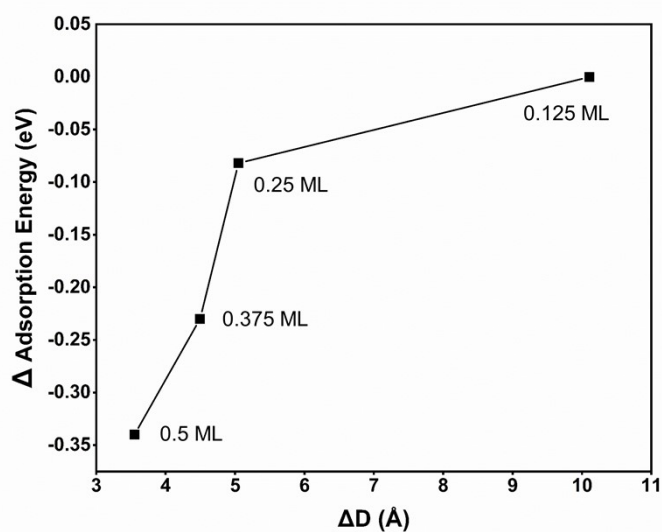

**Fig. S8.** The amount of change in adsorption energy of diamond (100) surface as a function of distance between two nearest neighboring Au atoms on diamond surface. The magnitude of the adsorption energy for a single Au at a coverage of 0.125 ML was used as a benchmark to obtain the corresponding change in adsorption energy.

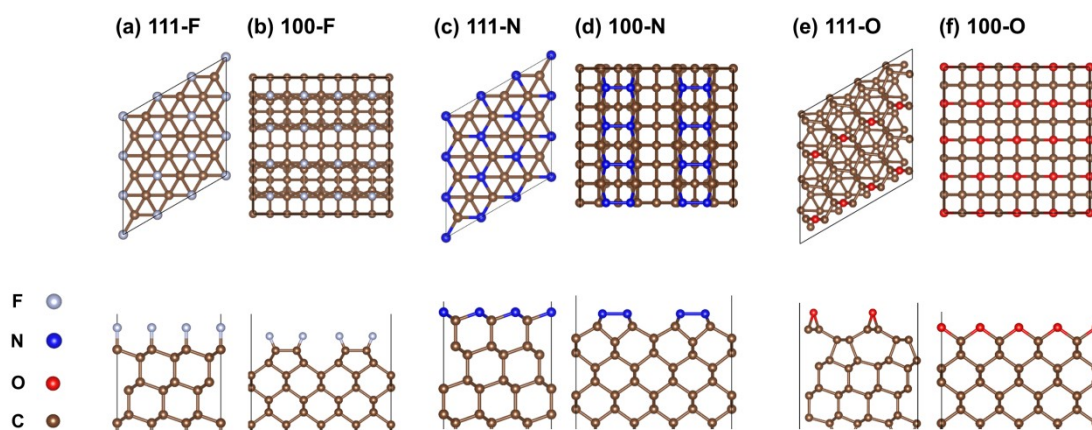

**Fig. S9.** Side and top views of diamond surfaces with (a) 111-F, (b) 100-F, (c) 111-N, (d) 100-N, (e) 111-O, and (f) 100-O.
